# Supplementary material for: Challenges and Recommendations for Improving Cancer Research and Practice in Nigeria: A Qualitative Study With Multi-Stakeholders in Oncology Research and Practice
Source: PubMed Central journal article supplement — Cancer Control. 2024 Nov 5;31:10732748241298331. doi: 10.1177/10732748241298331 (PMC11539147; doi:10.1177/10732748241298331), 2024-11-05
Supplement: sj-pdf-1-ccx-10.1177_10732748241298331.pdf [file sj-pdf-1-ccx-10.1177_10732748241298331.pdf]

## Key Informant Interview Guide

### Assessment Tool for Oncology Training Needs for Health Professionals in Africa.

1. What is the status of oncology nursing education in Nigeria? (*probe postgraduate, fellowships, postdoctoral*)
2. What is the status of oncology training for clinicians (**Nurses, Medical Doctors and Pharmacists**) in Nigeria? (*probe undergraduate, postgraduate, fellowships, postdoctoral*)
3. Can you comment on the quality of oncology education provided by institutions in Nigeria and the extent to which these prepared the trainees to care for cancer patients or participate in cancer research (*probe curriculum, clinical posting, availability of oncology facilities and equipment*)
4. In your views, what are the gaps in Oncology training for research and practice in Nigeria?
5. Can you describe the optimal way to build the oncology research capacities of the next generation of clinicians and researchers? (*Probe for different professionals- Doctors, Nurses, Pharmacists*)
6. What is the optimal way to teach oncology practice (*Probe for different professionals- Doctors, Nurses, Pharmacists*)
7. Describe the challenges in oncology training in Nigeria (*Probe for different professionals- Doctors, Nurses, Pharmacists*)
8. Explain the challenges in oncology research in Nigeria (*leadership, policy and governance, facilities and infrastructure, funding, weak clinical and research competencies of oncology scientists/clinicians*)
9. Describe the challenges in oncology practice in Nigeria (*Probe for different professionals- Doctors, Nurses, Pharmacists*)
10. General recommendations for improvement of oncology practice and research in Nigeria

## In-depth Interview Guide

### Assessment Tool for Oncology Training Needs for Health Professionals in Africa.

1. What is the status of oncology training for clinicians (**Nurses, Medical Doctors and Pharmacists**) in Nigeria? (*probe undergraduate, postgraduate, fellowships, postdoctoral*)
2. Can you comment on the quality of oncology education you received during your training and the extent to which these prepared you to care for cancer patients or participate in cancer research (*probe curriculum, clinical posting, availability of oncology facilities and equipment*)
3. We would like to know more about the skills and knowledge that you have found beneficial for you career in oncology research and practice.
4. Since receiving your degree, what are the training experiences you have had **OR** would like to have to supplement your formal education and training in oncology research and practice?
5. How do you currently fulfill your ongoing training needs in cancer research and practice? (*probe sources they rely to learn about something new or learn about a new area in oncology research and practice (e.g., webinars, books, online resources, talk with experts, attend trainings, etc.)?*)
6. What skills in oncology research and practice do you think are most important for a Nursing/Pharmacy/ Medical student to learn in school?
7. What are the gaps in Oncology training for research and practice in Nigeria?
8. What is the optimal way to build the oncology research capacities of the next generation of clinicians and researchers? (*Probe for different professionals- Doctors, Nurses, Pharmacists*)
9. What is the optimal way to teach oncology practice (*Probe for different professionals- Doctors, Nurses, Pharmacists*)
10. Describe the challenges in oncology training in research and practice in Nigeria (*Probe for different professionals- Doctors, Nurses, Pharmacists*)
11. Describe the challenges in oncology research in Nigeria (*leadership and governance, facilities and infrastructure, funding, weak clinical and research competencies of oncology scientists/clinicians*)
12. Describe the challenges in oncology practice in Nigeria (*Probe for different professionals- Doctors, Nurses, Pharmacists*)
13. General recommendations for improvement of oncology practice and research in Nigeria
